# Supplementary material for: Discovery of Natural Lead Compound from Dendrobium sp. against SARS-CoV-2 Infection
Source: MDPI journal article supplement (doi:10.3390/ph15050620), 2022-05-18
Supplement: s1 [file s1]

## 2.1. In silico Screening Study

The structure of 83 compounds found in *Dendrobium* sp. were collected to construct in-house library in 2D and 3D using ChemBioDraw and ChemBio3D.

**Table S1.** The structures of 83 compounds from *Dendrobium* sp. docked against SARS-CoV-2 spike protein

| Code | Compound                                                                                    | Structure |
|------|---------------------------------------------------------------------------------------------|-----------|
| DB01 | (2S)-Homoeriodictrol                                                                        |           |
| DB02 | (2S)-Eriodictyol                                                                            |           |
| DB03 | Quercetin-3-O- $\alpha$ -L-rhamnopyranosyl-(1 $\rightarrow$ 2)- $\beta$ -D-xylopyranoside   |           |
| DB04 | Kaempferol-3-O- $\alpha$ -L-rhamnopyranosyl-(1 $\rightarrow$ 2)- $\beta$ -D-xylopyranoside  |           |
| DB05 | Kaempferol-3-O- $\alpha$ -L-rhamnopyranosyl-(1 $\rightarrow$ 2)- $\beta$ -D-glucopyranoside |           |
| DB06 | Kaempferol-3,7-O-di- $\alpha$ -L-rhamnopyranoside                                           |           |

**Table S1.** The structures of 83 compounds from *Dendrobium* sp. docked against SARS-CoV-2 spike protein (cont.)

| Code | Compound                                     | Structure |
|------|----------------------------------------------|-----------|
| DB07 | Quercetin-3-O- $\alpha$ -L-rhamnopyranoside  |           |
| DB08 | Kaempferol-3-O- $\alpha$ -L-rhamnopyranoside |           |
| DB09 | Gigantol                                     |           |
| DB10 | Batatasin III                                |           |
| DB11 | 4,5,4'-Trihydroxy-3,3'-dimethoxybiphenyl     |           |
| DB12 | Brittonin A                                  |           |
| DB13 | Moscatilin<br>(Dendrophenol)                 |           |
| DB14 | Chrysotobibenzyl                             |           |

**Table S1.** The structures of 83 compounds from *Dendrobium* sp. docked against SARS-CoV-2 spike protein (cont.)

| Code | Compound                                    | Structure |
|------|---------------------------------------------|-----------|
| DB15 | Crepidatin                                  |           |
| DB16 | Chrysotoxine                                |           |
| DB17 | 5-hydroxy-3,4,3',4',5'-pentamethoxybibenzyl |           |
| DB18 | 4,4'-Dihydroxy-3,5-dimethoxybibenzyl        |           |
| DB19 | Tristin                                     |           |
| DB20 | 3,4-Dihydroxy-3,4'-dimethoxybibenzyl        |           |
| DB21 | Dendrocandin B                              |           |
| DB22 | Dendrocandin E                              |           |
| DB23 | Dendrocandin I                              |           |

**Table S1.** The structures of 83 compounds from *Dendrobium* sp. docked against SARS-CoV-2 spike protein (cont.)

| Code | Compound                                 | Structure |
|------|------------------------------------------|-----------|
| DB24 | 4,3',4'-Trihydroxy-3,5-dimethoxybibenzyl |           |
| DB25 | Aloifol I                                |           |
| DB26 | 3,3'-Dihydroxy-4,5-dimethoxybibenzyl     |           |
| DB27 | 5,4'-dihydroxy-3,4,3'-trimethoxybibenzyl |           |
| DB28 | Dendrosinen B                            |           |
| DB29 | Fimbriatone                              |           |
| DB30 | Flavanthrinin                            |           |
| DB31 | Densiflorol B                            |           |
| DB32 | Confusarin                               |           |
| DB33 | Nudol                                    |           |

**Table S1.** The structures of 83 compounds from *Dendrobium* sp. docked against SARS-CoV-2 spike protein (cont.)

| Code | Compound                                                 | Structure |
|------|----------------------------------------------------------|-----------|
| DB34 | 2,5-Dihydroxy-4,9-dimethoxyphenanthrene                  |           |
| DB35 | Dendroscabrol A                                          |           |
| DB36 | 5-Methoxy-7-hydroxy-9,10-dihydro-1,4-phenanthrenequinone |           |
| DB37 | Hircinol                                                 |           |
| DB38 | 7-Methoxy-9,10-dihydro-phenanthrene-2,4,5-triol          |           |
| DB39 | 4,5-Dihydroxy-2,3-dimethoxy-9,10-dihydrophenanthrene     |           |
| DB40 | Lusianthridin                                            |           |
| DB41 | Erianthridin                                             |           |
| DB42 | Coelonin                                                 |           |
| DB43 | 2,5,7-Trihydroxy-4-methoxy-9,10-dihydrophenanthrene      |           |

**Table S1.** The structures of 83 compounds from *Dendrobium* sp. docked against SARS-CoV-2 spike protein (cont.)

| Code | Compound                           | Structure |
|------|------------------------------------|-----------|
| DB44 | Dendroinfundin A                   |           |
| DB45 | Dendroinfundin B                   |           |
| DB46 | Ephemeranthal A                    |           |
| DB47 | Syringaresinol                     |           |
| DB48 | Liriodendrin                       |           |
| DB49 | 4-(2-Hydroxypropyl)-2(5H)-furanone |           |
| DB50 | Nobilone                           |           |
| DB51 | Dendroflorin                       |           |
| DB52 | Denchrysan B                       |           |
| DB53 | Scoparone                          |           |

**Table S1.** The structures of 83 compounds from *Dendrobium* sp. docked against SARS-CoV-2 spike protein (cont.)

| Code | Compound                                                                 | Structure                                                                             |
|------|--------------------------------------------------------------------------|---------------------------------------------------------------------------------------|
| DB54 | 5,7-Dihydroxy-chromen-4-one<br>(5,7-Dihydroxychromone)                   | 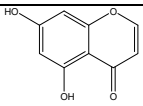   |
| DB55 | Asiatic acid                                                             |    |
| DB56 | Docosanoyl ( <i>E</i> )-ferulate                                         |    |
| DB57 | Tetracosyl ( <i>Z</i> )- <i>p</i> -coumarate                             |    |
| DB58 | Tetracosyl ( <i>E</i> )- <i>p</i> -coumarate                             |   |
| DB59 | trans-Tetracosylferulate<br>[( <i>E</i> )-Ferulic acid tetracosyl ester] |  |
| DB60 | cis-Docosylferulate                                                      |  |
| DB61 | ( <i>Z</i> )-Ferulic acid tetracosyl ester                               |  |
| DB62 | <i>n</i> -Eicosyl <i>trans</i> -ferulate                                 |  |
| DB63 | <i>n</i> -Docosyl 4-hydroxy-<br><i>trans</i> -cinnamate                  |  |
| DB64 | 2-( <i>p</i> -Hydroxyphenyl)<br>ethyl <i>p</i> -coumarate                |   |
| DB65 | <i>p</i> -Hydroxybenzoic acid                                            |  |
| DB66 | <i>p</i> -Hydroxybenzaldehyde                                            |  |

**Table S1.** The structures of 83 compounds from *Dendrobium* sp. docked against SARS-CoV-2 spike protein (cont.)

| Code | Compound                                  | Structure                                                                             |
|------|-------------------------------------------|---------------------------------------------------------------------------------------|
| DB67 | Ferulic acid                              | 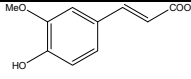   |
| DB68 | Dihydroconiferyl dihydro-p-coumarate      |    |
| DB69 | Methyl haematommate                       |    |
| DB70 | Methyl 2,4-dihydroxy-3,6-dimethylbenzoate |    |
| DB71 | Vanillin                                  |    |
| DB72 | Coniferyl aldehyde                        |   |
| DB73 | RF-3192C                                  |  |
| DB74 | (-)-Shikimic acid                         |  |
| DB75 | Diorcinolic acid                          |  |
| DB76 | Dendrofalconerol A                        |  |
| DB77 | Dendrofalconerol B                        |  |



**Table S1.** The structures of 83 compounds from *Dendrobium* sp. docked against SARS-CoV-2 spike protein (cont.)

| Code | Compound            | Structure                                                                             |
|------|---------------------|---------------------------------------------------------------------------------------|
| DB78 | Dendroscabrol B     | 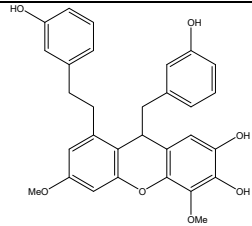   |
| DB79 | Dendrosignatol      |    |
| DB80 | (-)-Dendroparishiol |   |
| DB81 | Phoyunnanin E       |   |
| DB82 | Phoyunnanin C       |   |
| DB83 | Dendropalpebrone    |  |

### 3. Discussion

The binding modes of DB31, DB40 and DB51 with spike protein were shown in Figure S9.

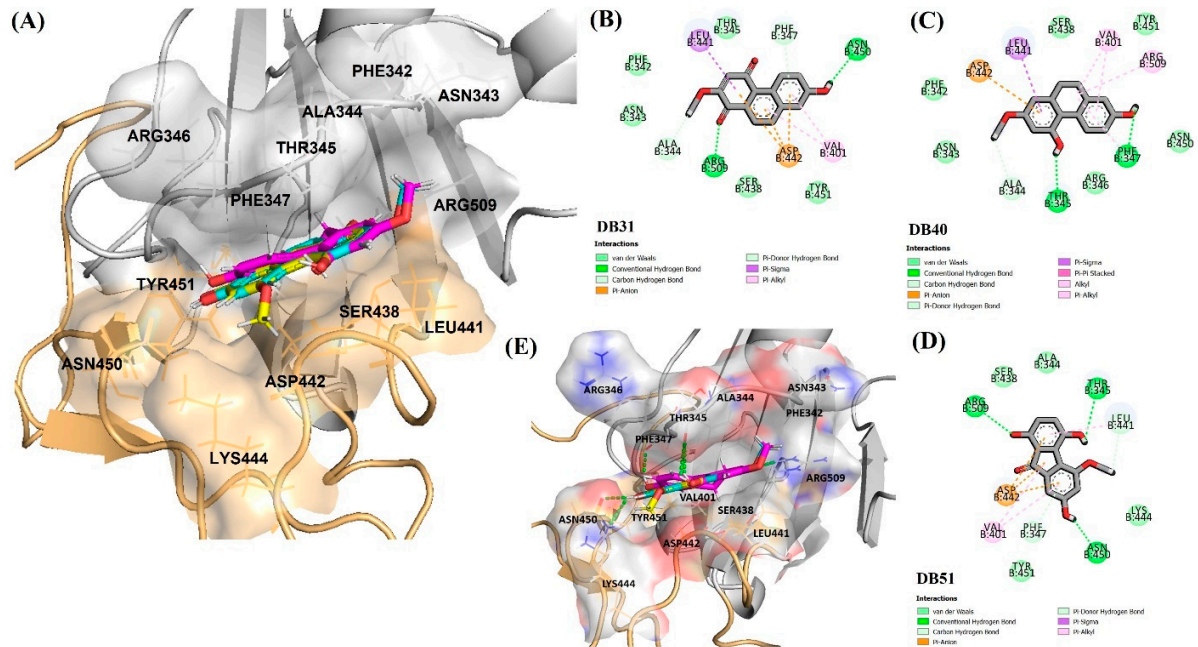

**Figure S1.** Binding modes of DB31, DB40 and DB51 located in the S1-RBD of spike protein adjacent to the binding motif (RBM) region in an orange color surface; (A) surface view of DB31, DB40 and DB51 binding position between RBM (orange color) and RBD (gray color) regions.; (B) amino acid interactions of DB31 (B), DB40 (C), DB51 (D) and (E) surface view (color by atom type) of DB31, DB40 and DB51 binding modes (E).
